# Supplementary material for: Conductance fluctuations in cobalt valence tautomer molecular thin films
Source: Royal Society of Chemistry journal article supplement (doi:10.1039/d4dt02213k), 2024-01-01
Supplement: d4dt02213k1.pdf [file d4dt02213k1.pdf]

## Supplementary materials to:

### Conductance Fluctuations in Cobalt Valence Tautomer Molecular Thin Films

Jared P. Phillips<sup>1</sup>, Saeed Yazdani<sup>1</sup>, Joseph Soruco<sup>1</sup>, Jackson Oles<sup>1</sup>, Thilini K. Ekanyaka<sup>2</sup>, Esha Mishra<sup>2</sup>, Ping Wang<sup>3</sup>, M. Zaid Zaz<sup>2</sup>, Jing Liu<sup>1</sup>, Alpha T N'Diaye<sup>4</sup>, Michael Shatruk<sup>3</sup>, Peter A. Dowben<sup>2</sup>, Ruihua Cheng<sup>1</sup>

1. Department of Physics, Indiana University-Purdue University Indianapolis, Indianapolis, Indiana 46202, USA
2. Department of Physics and Astronomy, Jorgensen Hall, University of Nebraska, Lincoln, NE 68588-0299, USA.
3. Department of Chemistry and Biochemistry, Florida State University, 95 Chieftain Way, Tallahassee, FL 32306, USA
4. Advanced Light Source, Lawrence Berkeley National Laboratory, Berkeley, CA 94720, USA

**Synthesis of [Co(SQ)<sub>2</sub>(3-tpp)<sub>2</sub>].** The synthetic procedures were carried out under an inert atmosphere of dry nitrogen gas using standard Schlenk techniques. Commercial HPLC-grade solvents were obtained from Fisher Scientific and additionally purified by passing through a double-stage drying/purification system (Pure Process Technology, Nashua, NH, USA). Elemental analyses were carried out by Atlantic Microlab, Inc. (Norcross, GA, USA). Co<sub>2</sub>(CO)<sub>8</sub> (with 1-10 wt.% of hexane) and 3-thiopheneboronic acid (>98%) were purchased from Millipore Sigma and VWR, respectively. The compounds [Co<sub>4</sub>(SQ)<sub>8</sub>] (SQ = 3,5-di-tert-butylsemiquinonate)<sup>1</sup> and 4-(3-thienyl)pyridine (3-tpp)<sup>2</sup> were synthesized according to the previously published procedures.<sup>3</sup> The complex [Co(SQ)<sub>2</sub>(3-tpp)<sub>2</sub>] was synthesized by layering a solution of [Co<sub>4</sub>(SQ)<sub>8</sub>] (270 mg, 0.135 mmol) in 8 mL of toluene on top of a 5 mL dichloromethane solution of 3-tnp (172 mg, 1.07 mmol). Dark-blue crystals that formed after 2 weeks were washed with toluene and dried under vacuum at 100 °C for 24 h to produce a dark-green solid. Yield = 180 mg (42%). *Elem. Anal.* (%): Calcd. (Found) for C<sub>46</sub>H<sub>55</sub>CoN<sub>2</sub>O<sub>4</sub>S<sub>2</sub> (= [Co(SQ)<sub>2</sub>(3-tpp)<sub>2</sub>): C, 67.13 (66.84); H, 6.74 (6.73); N, 3.40 (3.31), as previously described.<sup>3</sup>

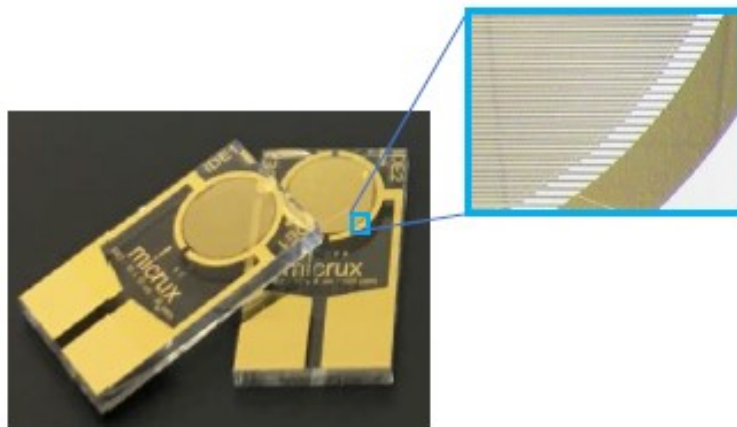

Figure S1. Micrux interdigitated electrodes. Each gold electrode pair measures 200 nm high with a 5 μm gap.

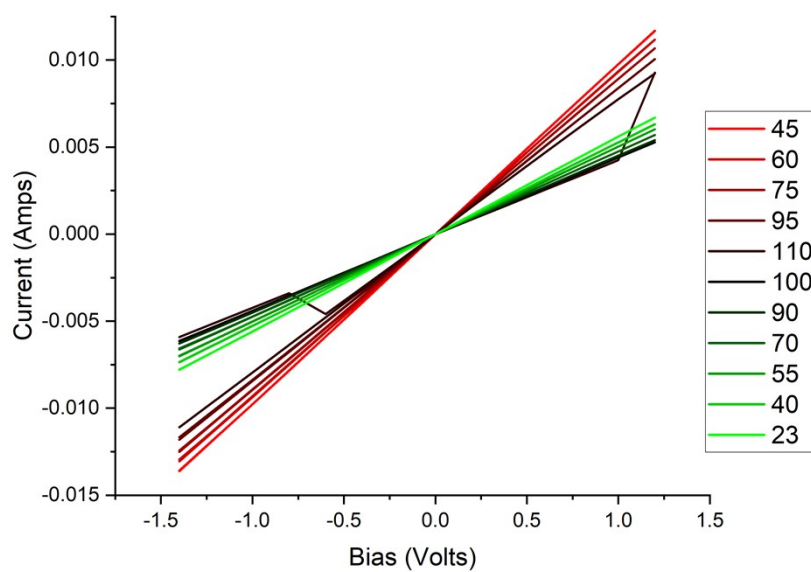

Figure S2. Temperature dependent IV raw data of thin film of  $[\text{Co}(\text{SQ})(\text{Cat})(3\text{-tpp})_2]$  measurement under incandescent light irradiation. The temperature is indicated in Celsius.

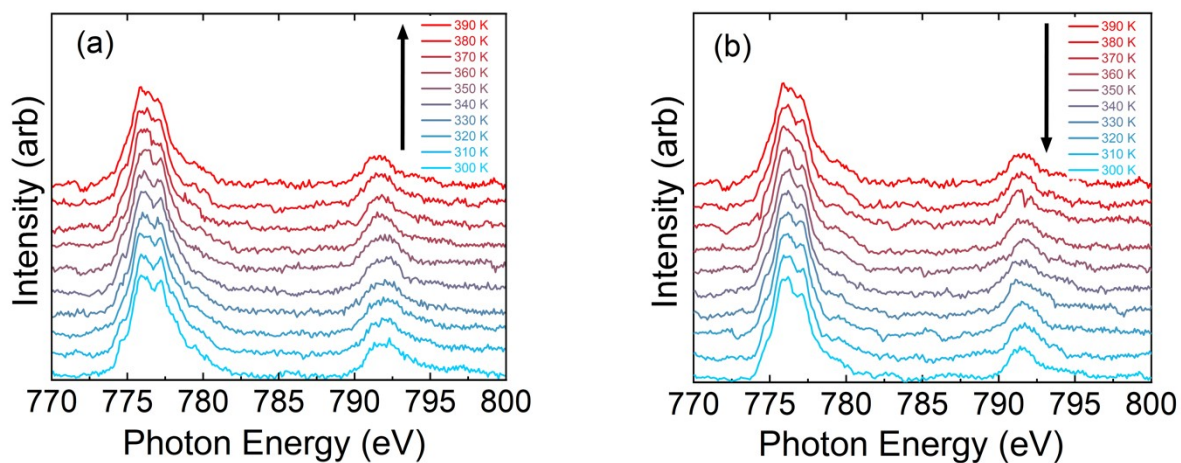

Figure S3. Temperature dependent X-ray absorption spectra of a 75 nm thin film of  $[\text{Co}(\text{SQ})(\text{Cat})(3\text{-tpp})_2]$  on a HOPG substrate taken with (a) an increasing temperature cycle (b) and the subsequent decreasing temperature cycle.

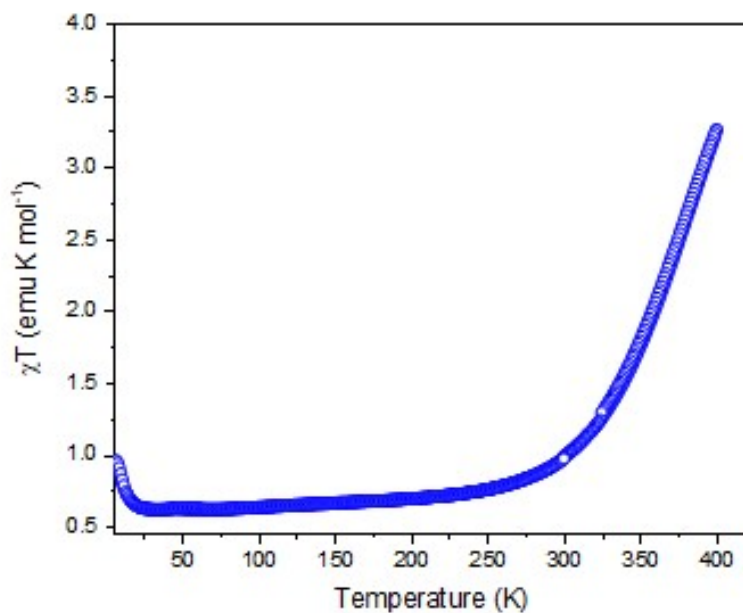

Figure S4: Temperature dependent magnetic susceptibility of  $[\text{Co}(\text{SQ})(\text{Cat})(3\text{-tpp})_2]$  powder.

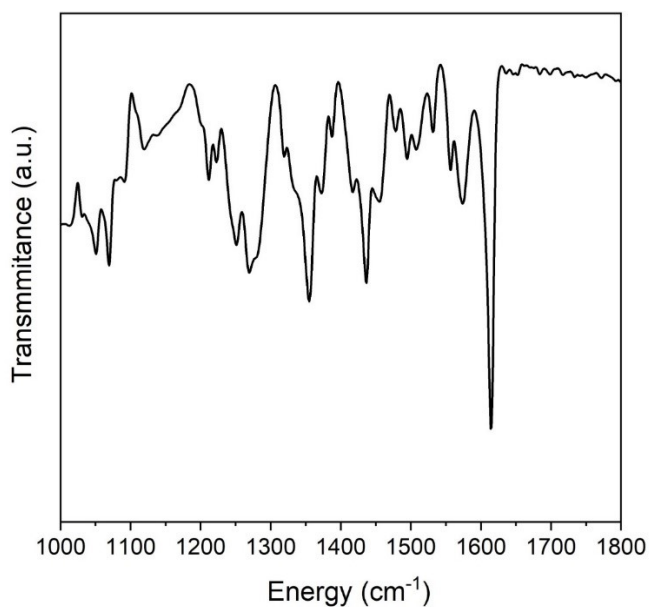

Figure S5: Infrared spectrum of  $[\text{Co}(\text{SQ})(\text{Cat})(3\text{-tpp})_2]$  [published in a previous manuscript<sup>3</sup>].

1. M. Buchanan, B. J. Fitzgerald and C. G. Pierpont, Semiquinone radical anion coordination to divalent cobalt and nickel. Structural features of the bis (3, 5-di-tert-butyl-1, 2-semiquinone) cobalt (II) tetramer. *Inorg. Chem.*, 1979, **18**, 3439-3444.
2. C. Hertzog-Ronen, E. Borzin, Y. Gerchikov, N. Tessler and Y. Eichen, Detection and identification of alkylating agents by using a bioinspired "Chemical Nose". *Eur. J. Chem.*, 2009, **15**, 10380-10386.
3. Ping Wang, Sandugash Yergeshbayeva, Xinsong Lin, Shubham Bisht, Miguel Gakiya-Teruya, and Michael Shatruk, "Structural and Magnetic Investigation of Cobalt Valence Tautomeric Complexes with Sulfur-Containing Ligands", *Cryst. Growth Des.* 2023, **23**, 2384–2394; <https://doi.org/10.1021/acs.cgd.2c01373>
